# Supplementary material for: Catchment Soil Properties Affect Metal(loid) Enrichment in Reservoir Sediments of German Low Mountain Regions
Source: MDPI journal article supplement (doi:10.3390/app12052277), 2022-02-22
Supplement: s1 [file s1]

## Supplementary material

**Table S1.** Precautionary values according to the German Federal Soil Protection Ordinance (mg kg<sup>-1</sup>).

| Texture      | As | Cd  | Cr  | Cu | Fe | Hg  | Mn | Ni | Pb  | V | Zn  |
|--------------|----|-----|-----|----|----|-----|----|----|-----|---|-----|
| Sand         | -  | 0.4 | 30  | 20 | -  | 0.1 | -  | 15 | 40  | - | 60  |
| Silt or Loam | -  | 1.0 | 60  | 40 | -  | 0.5 | -  | 50 | 70  | - | 150 |
| Clay         | -  | 1.5 | 100 | 60 | -  | 1   | -  | 70 | 100 | - | 200 |

<sup>1</sup> The application on arable land requires that the metal concentrations of the applied material do not exceed 70% of the precautionary values.

**Table S2.** Rotated component matrix of the three analyzed components (EV: Eigen value; Vt (%): percentage of total variance; Vc (%): cumulative percentage of variance).

| Comp.              | 1     | 2     | 3     |
|--------------------|-------|-------|-------|
| Cr                 | .942  | .156  | -.051 |
| Al                 | .905  | .096  | -.021 |
| V                  | .903  | .229  | .026  |
| Fe                 | .854  | .333  | -.173 |
| As                 | .784  | .215  | .049  |
| CN                 | -.536 | -.349 | .454  |
| Zn                 | .478  | .803  | .130  |
| Cd                 | .244  | .762  | .447  |
| pH                 | .167  | .756  | -.274 |
| Ni                 | .561  | .727  | .000  |
| Mn                 | .135  | .654  | -.007 |
| Pb                 | .012  | .463  | .328  |
| TOC                | -.156 | -.030 | .957  |
| N <sub>t</sub>     | .068  | .180  | .925  |
| EV                 | 4.83  | 3.37  | 2.42  |
| V <sub>t</sub> (%) | 34.5  | 24.0  | 17.2  |
| V <sub>c</sub> (%) | 34.5  | 58.5  | 75.8  |

**Table S3.** Percentage of easily extractable trace metal concentrations on the aqua regia soluble concentrations of air-dried reservoir sediments (RS).

|        | As   | Cd   | Cr   | Fe   | Mn   | Ni   | Pb   | V    | Zn   |
|--------|------|------|------|------|------|------|------|------|------|
| Mean   | 1.26 | 10.9 | 0.07 | 0.02 | 62.1 | 4.41 | 0.19 | 0.03 | 2.93 |
| Median | 0.59 | 7.17 | 0.06 | 0.01 | 71.2 | 3.30 | 0.06 | 0.02 | 0.67 |
| SD     | 1.92 | 9.61 | 0.03 | 0.02 | 36.8 | 5.43 | 0.29 | 0.02 | 4.87 |
| Min    | 0.20 | 0.88 | 0.02 | 0.00 | 0.73 | 0.28 | 0.01 | 0.01 | 0.13 |
| Max    | 9.31 | 38.1 | 0.15 | 0.06 | 100  | 20.5 | 1.13 | 0.13 | 19.4 |

**Table S4.** The variability of the median values of the element-specific enrichment factors (EF) illustrated by the example of the Breitenbach, Obernau and Bitburg reservoirs (RS: reservoir sediment; SS: stream sediment; CS: catchment soil).

|                    |           | <b>As</b> | <b>Cd</b> | <b>Cr</b> | <b>Fe</b> | <b>Mn</b> | <b>Ni</b> | <b>Pb</b> | <b>V</b> | <b>Zn</b> |
|--------------------|-----------|-----------|-----------|-----------|-----------|-----------|-----------|-----------|----------|-----------|
| <b>Breitenbach</b> | <b>RS</b> | 4.3       | 10.2      | 2.8       | 5.3       | 40.5      | 8.9       | 21.2      | 3.0      | 10.4      |
|                    | <b>SS</b> | 7.1       | 13.9      | 3.7       | 8.9       | 19.0      | 20.9      | 42.6      | 4.0      | 14.0      |
|                    | <b>CS</b> | 6.3       | 2.4       | 3.5       | 5.2       | 3.1       | 3.9       | 36.2      | 4.1      | 3.3       |
| <b>Obernau</b>     | <b>RS</b> | 3.0       | 8.2       | 3.2       | 4.2       | 27.6      | 7.4       | 6.0       | 3.2      | 6.4       |
|                    | <b>SS</b> | 3.8       | 2.2       | 3.2       | 4.9       | 7.6       | 6.5       | 4.7       | 2.4      | 3.5       |
|                    | <b>CS</b> | 3.9       | 2.5       | 3.1       | 4.3       | 4.4       | 3.9       | 6.2       | 3.0      | 2.9       |
| <b>Bitburg</b>     | <b>RS</b> | 2.9       | 2.5       | 2.8       | 3.9       | 3.5       | 4.9       | 8.9       | 3.0      | 4.1       |
|                    | <b>SS</b> | 4.7       | 1.7       | 3.4       | 5.4       | 6.0       | 5.8       | 3.5       | 2.9      | 3.3       |
|                    | <b>CS</b> | 2.9       | 1.1       | 2.7       | 4.0       | 5.9       | 4.2       | 2.4       | 2.4      | 2.5       |
